# Supplementary material for: A three-dimensional nodal neutron kinetics capability for relaps
Source: Royal Society of Chemistry journal article supplement (doi:10.1039/d3bm01611k), 1996-05-01
Supplement: d3bm01611k1.pdf [file d3bm01611k1.pdf]

**Table S1 Antibodies, sources, concentration and applications**

| <b>Reagents</b>                       | <b>Source (catalogue numbers)</b> | <b>Concentration</b> | <b>Application</b> |
|---------------------------------------|-----------------------------------|----------------------|--------------------|
| E-cadherin                            | Abcam (ab1416)                    | 1:400                | IHC-P              |
| Anti-pan Cyrokeratin (AE1/AE3)        | Abcam (ab86734)                   | 1:400                | IF                 |
| Alpha-SMA                             | Abcam (ab5694)                    | 1:400                | IHC-P/IF           |
| Anti-Hsp47                            | Abcam (ab109117)                  | 1:400                | IHC-P/IF           |
| Anti-PGP9.5                           | Abcam (ab8189)                    | 1:400                | IHC-P              |
| Anti-vimentin                         | Abcam (ab92547)                   | 1:500                | IF                 |
| Anti-Estrogen Receptor alpha antibody | Abcam (ab32063)                   | 1:500                | IHC-P              |
| Anti-Von Willebrand Factor            | Abcam (ab6994)                    | 1:400                | IHC-P              |
| Anti-CD45                             | Abcam (ab10558)                   | 1:500                | IHC-P              |
| Anti-H-caldesmon                      | Santa Cruz (sc-58703)             | 1:100                | IF                 |

**Table S2 Primers**

| <b>Gene name</b> | <b>Forward</b>    | <b>Reverse</b>     |
|------------------|-------------------|--------------------|
| CDH1(E-cadherin) | CCCAACACTTCTCCCTT | CCCCTCACAGTCGCATA  |
| ACTA2 (a-SMA)    | GGTTCTGGGCTCTGTAA | ATGATGCCGTGTTCTATT |

|                 |                   |                     |
|-----------------|-------------------|---------------------|
| SERPINH1(HSP47) | GCAGCAAGCAGCACTAC | GAATCGCTCATCCCAGT   |
| UCHL1 (PGP9.5)  | CTGCTCTTTCCCCTCAC | TGGATAGCCTCATTCTTTT |
| VWF             | TGTTTGTCAATGGCACC | TCCCCTCCTGAGTCTTAA  |
| ESR1            | GTGCCCTCTATGACCT  | CCTCCCCTGTGATGTAA   |
| GAPDH           | TCACCAGGGCTGCTTTT | TTTGATGTTGGCGGGAT   |

---

Figure S1

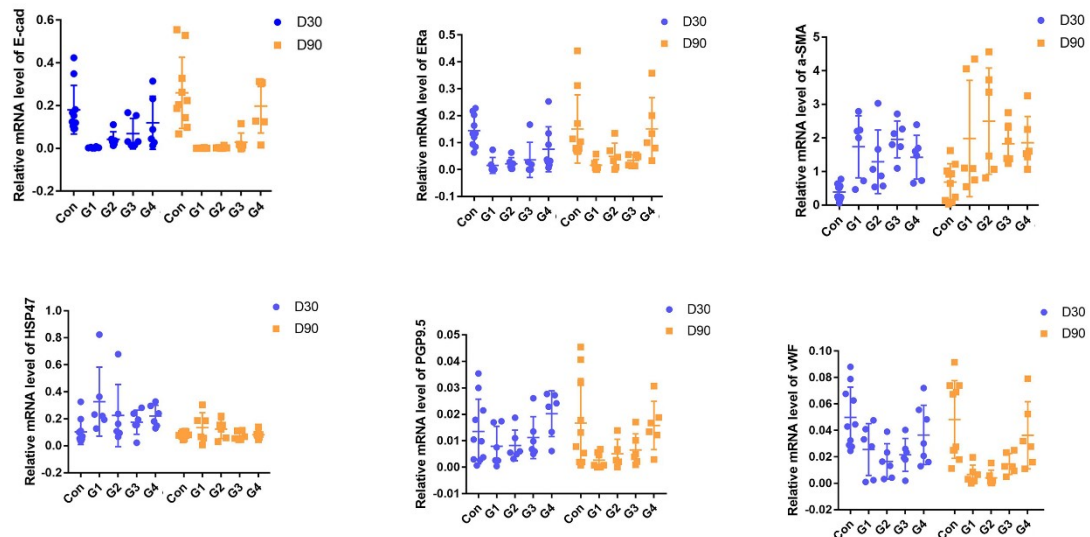

The mRNA levels of E-cadherin, ER $\alpha$ ,  $\alpha$ -SMA, HSP47, PGP9.5, and vWF in regenerated vaginal tissues.
